# Supplementary material
Source: PubMed Central journal article supplement (PMC3193466)
Supplement: cr201148x2.pdf [file cr201148x2.pdf]

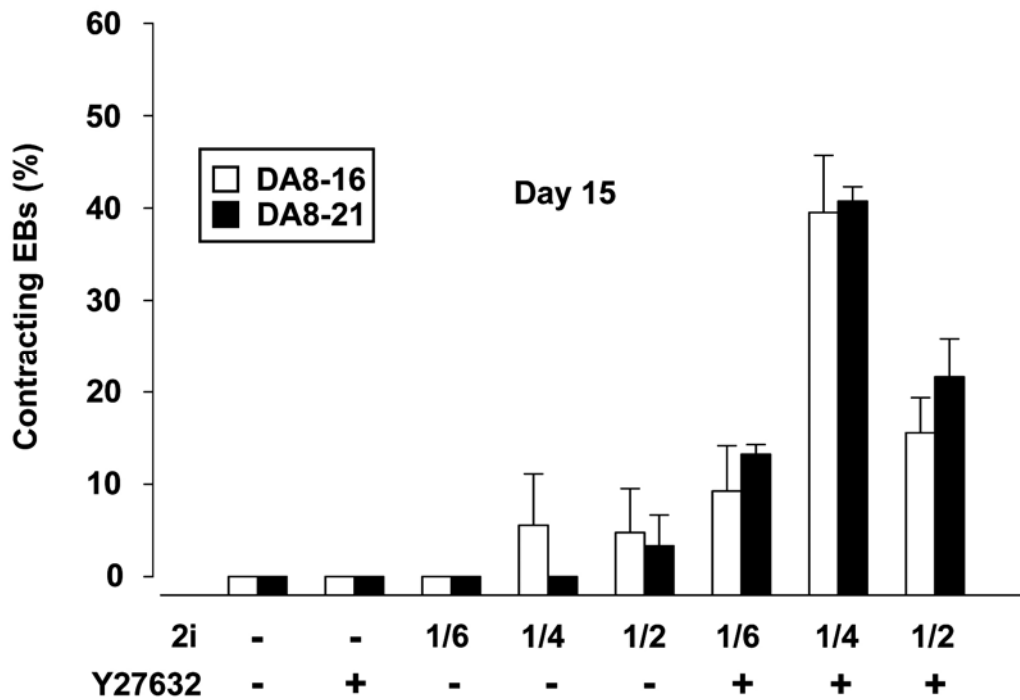

**Supplementary information, Figure S2** Analysis of the significance of rEFM for cardiac differentiation of rESCs.

Comparisons of cardiac differentiation potential of EBs generated in various conditions. Data were collected at differentiation day 15 from three independent assays. Fractions indicate the proportion of origin concentration (0.4  $\mu$ M PD0325901 and 3  $\mu$ M CHIR99021) of 2i applied.

Y27632 was added at 10  $\mu$ M.
