# Supplementary material
Source: PubMed Central journal article supplement (PMC3193466)
Supplement: cr201148x3.pdf [file cr201148x3.pdf]

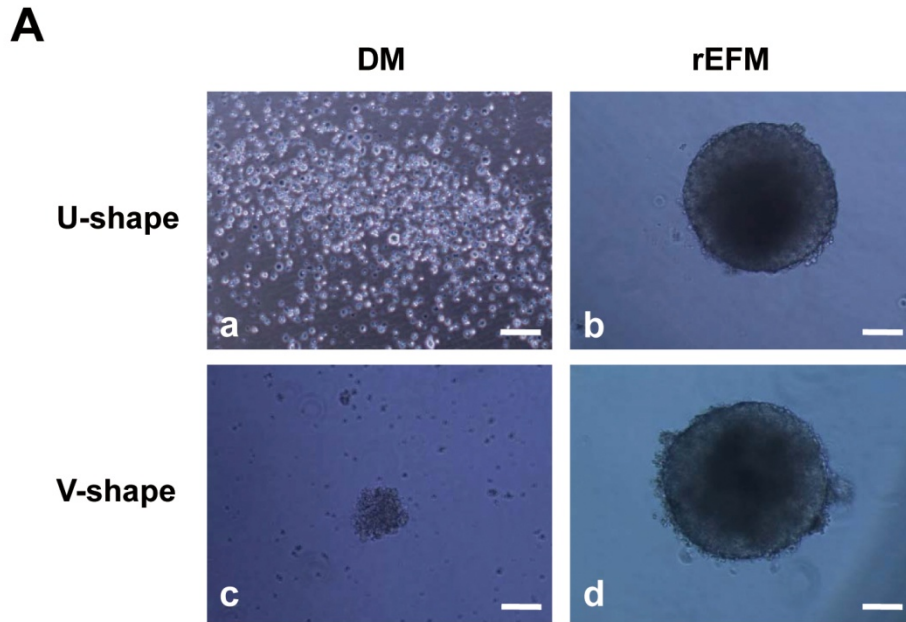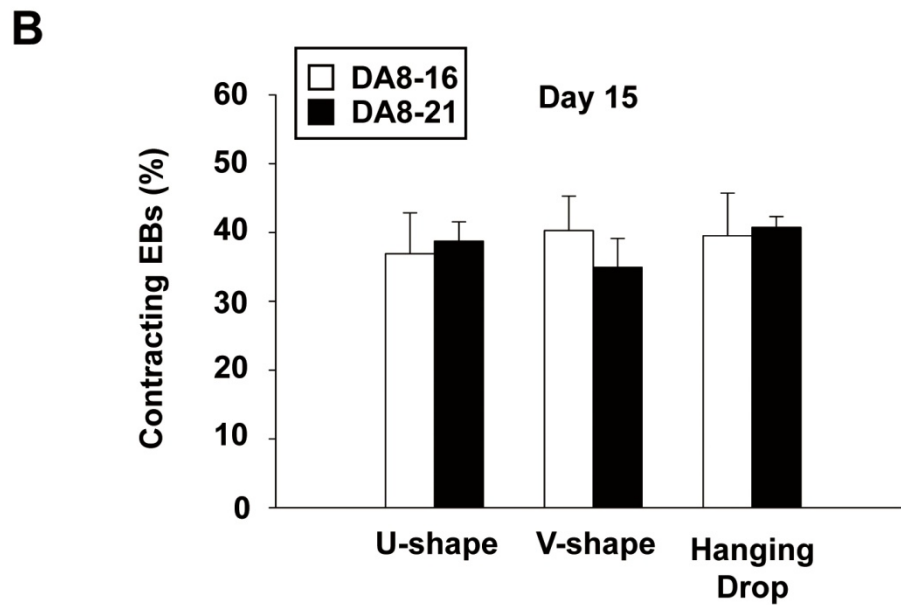

**Supplementary information, Figure S3** Comparisons of EB generation methods.

(A) Phase contrast images show day 2 EBs formed in DM (a, c) or rEFM (b, d) by U-shape or V-shape system. The initial cell number is 3000 per EB. (B) Comparison of the cardiac differentiation efficiency of EBs generated with U-shape and V-shape systems or with the hanging drop method. Data were collected at differentiation day 15 from three independent assays.
