# Supplementary material
Source: PubMed Central journal article supplement (PMC3193466)
Supplement: cr201148x6.pdf [file cr201148x6.pdf]

**Supplementary information, Table S1** Primer Sequences for RT- PCR

| Gene      | Primer Sequence (5' to 3')                             | AT (°C) | PS (bp) |
|-----------|--------------------------------------------------------|---------|---------|
| Oct4      | F-GGGATGGCATACTGTGGAC<br>R-CTTCCTCCACCCACTTCTC         | 57      | 412     |
| Nanog     | F-GCCCTGAGAAGAAAGAAGAG<br>R-CGTACTGCCCCATACTGGAA       | 57      | 356     |
| Sox2      | F-GGCGGCAACCAGAAGAACAG<br>R-GTTGCTCCAGCCGTTTCATGTG     | 57      | 414     |
| Nestin    | F-AGAGAAGCGCTGGAACAGAG<br>R-AGGTGTCTGCAACCGAGAGT       | 60      | 234     |
| Sox17     | F-GCCAAAGACGAACGCAAGCGGT<br>R-TCATGCGCTTCACCTGCTTG     | 60      | 211     |
| Afp       | F-GCTCAGCGAGGAGAAATGG<br>R-CTTCACCAGGTTAATGAGAAGC      | 60      | 286     |
| Brachyury | F-AACTGCGAGTGGGTCTGGAAG<br>R-TGGGTCTCGGGAAAGCAGTG      | 57      | 451     |
| Flk1      | F-CTGTGGCGTTTCCTACTCCT<br>R-AGGAGCAAGCTGCATCATTT       | 60      | 93      |
| Gata6     | F-GCTGAACGGAACGTACCACC<br>R-ACAGTGGCGTCTGGATGGAG       | 60      | 236     |
| Isl1      | F-GACATGATGGTGGTTTACAGGC<br>R-GCTGTTGGGTGTATCTGGGAG    | 60      | 209     |
| My17      | F-CCCATCAACTTCACCGTCTTCCT<br>R-AGAGAACTTGTCTGCCTGGGTCA | 60      | 167     |
| Itpr2     | F-CCTCTACATTGGGGACATCGT<br>R-GGCACACCTTGAAGAGGCA       | 60      | 161     |
| Cacna1a   | F-CCTGCTGGTGGTTAGCGTG<br>R-TCTGCCTCCGTCTGTTTGGAA       | 60      | 285     |
| Ryr2      | F-ACATCATGTTTTACCGCCTGAG<br>R-TTTGTGGTTATTGAACTCTGGCT  | 60      | 230     |
| Gja1      | F-ACAGCTGTTGAGTCAGCTTG<br>R-GAGAGATGGGGAAGGACTTGT      | 60      | 106     |
| Slc8a1    | F-AGGTCCATGCTAGAGATCATCC<br>R-CATCATCGTCATCTTCCCA      | 60      | 300     |

AT, annealing temperature; PS, product size; F, forward; R, reverse.
