# Supplementary material
Source: PubMed Central journal article supplement (PMC3193466)
Supplement: cr201148x7.pdf [file cr201148x7.pdf]

**Supplementary information, Table S2** Primer Sequences for Q-PCR

| Gene   | Primer Sequence (5' to 3')                          | AT (°C) | PS (bp) |
|--------|-----------------------------------------------------|---------|---------|
| Oct4   | F-CCCCATTTACCCACTCTACTC<br>R-GTGACAGGAACAGAGGGAAAGG | 60      | 68      |
| Nanog  | F-GACTAGCAACGGCCTGACTCA<br>R-CTGCAATGGATGCTGGGATA   | 60      | 63      |
| Rex1   | F-TTCTTGCCAGGTTCTGGAAGC<br>R-TTCCCACACTCTGCACACAC   | 60      | 297     |
| Gata4  | F-CCTGGAAGACACCCCAATCTC<br>R-AGGTAGTGTCCCGTCCCATCT  | 60      | 116     |
| Nkx2.5 | F-CGGTGGAGCTGGACAAAGCC<br>R-TAGCGGCGGTTCTGGAACCA    | 60      | 217     |
| Tbx5   | F-CCCAGCAAGTCTCCATCAT<br>R-CCAGTTACGGACCATTTGTT     | 60      | 272     |
| Tnnt2  | F-GCGGAAGAGTGGGAAGAGACA<br>R-CCACAGCTCCTTGGCCTTCT   | 60      | 127     |
| Myh6   | F-GATGCCCAGATGGCTGACTT<br>R-GGTCAGCATGGCCATGTCCT    | 60      | 275     |
| Myl2   | F-AAAGAGGCTCCAGGTCCAAT<br>R-CCTCTCTGCTTGCGTGGTTA    | 60      | 174     |
| Gapdh  | F-ATCACTGCCACTCAGAAG<br>R-AAGTCACAGGAGACAACC        | 60      | 317     |

AT, annealing temperature; PS, product size; F, forward; R, reverse.
